# Supplementary material for: Presence of primordial Mg explains the seismic low-velocity layer in the Earth’s outermost outer core
Source: Research Square preprint supplement (doi:10.21203/rs.3.rs-6039693/v1), 2025-06-10
Supplement: Supplementary file 2 [file 93a318bfda24917fbc5839db.xlsx]

## Sheet: Sheet1
Table S1:The Mg conent of the outer ocre based on PREM constraints(1 layer)													Table S3:The Mg conent of the outer ocre based on EPOC constraints(1 layer)
	Mg(∆≤0.25)			Mg(∆≤0.5)			Mg(∆≤1.0)			∆_min				Mg(∆≤0.25)			Mg(∆≤0.5)			Mg(∆≤1.0)			∆_min
FeCO										4.05			FeCO										4.68
FeCS	0.85	1.55		0.64	1.77		0.37	2.07		0.1			FeCS				0.87	1.18		0.44	1.64		0.46
FeHC										2.14			FeHC										3.19
FeHO										2.14			FeHO										3.19
FeHS	0.7	1.38		0.46	1.61		0.16	1.89		0.12			FeHS				0.87	1.18		0.42	1.62		0.46
FeOS	0.8	1.4		0.59	1.62		0.33	1.89		0.12			FeOS				0.87	1.18		0.44	1.62		0.46
FeSiC	1.02	1.79		0.84	1.97		0.59	2.23		0.04			FeSiC				0.75	1.56		0.45	1.86		0.26
FeSiH	0.5	1.19		0.26	1.43		0	1.74		0.11			FeSiH				0.52	1.34		0.17	1.7		0.3
FeSiO	0.7	1.41		0.51	1.61		0.26	1.87		0.07			FeSiO				0.64	1.38		0.33	1.71		0.29
FeSiS	0.85	1.38		0.63	1.61		0.37	1.89		0.15			FeSiS				0.71	1.37		0.39	1.71		0.34
Table S2:The Mg conent of the upper outer ocre based on PREM constraints(2 layers)													Table S4:The Mg conent of the upper outer ocre based on EPOC constraints(2 layer)
	Mg(∆≤0.25)			Mg(∆≤0.5)			Mg(∆≤1.0)			∆_min				Mg(∆≤0.25)			Mg(∆≤0.5)			Mg(∆≤1.0)			∆_min
FeCO										11.59			FeCO										11.22
FeCS							0.78	2.63		0.67			FeCS				1.14	2.41		0.67	2.82		0.34
FeHC										1.83			FeHC										3
FeHO										1.87			FeHO										3.05
FeHS				0.78	1.63		0.11	2.11		0.39			FeHS				0.88	1.8		0.27	2.26		0.37
FeOS							0.64	2		0.57			FeOS				1.12	1.79		0.66	2.28		0.38
FeSiC										1.42			FeSiC							0.72	2.65		0.61
FeSiH	0.94	1.36		0.45	1.74		0	2.15		0.22			FeSiH	1.05	1.58		0.63	1.89		0.18	2.29		0.2
FeSiO							0.48	1.97		0.58			FeSiO				0.92	1.79		0.48	2.28		0.34
FeSiS							0.6	1.86		0.67			FeSiS				0.9	1.83		0.48	2.28		0.32
